# Supplementary material for: Comparative analysis of the major constituents in three related polygonaceous medicinal plants using pressurized liquid extraction and HPLC-ESI/MS
Source: Royal Society of Chemistry journal article supplement (doi:10.1039/c5ay02941d), 2016-01-01
Supplement: c5ay02941d1.pdf [file c5ay02941d1.pdf]

### **Electronic Supplementary Information**

#### Preparation of spiked samples for optimization of PLE conditions

Spiked samples were prepared by adding appropriate amounts of eight standards solutions to dry blank dregs, and the final contents of the standards in the spiked samples were: piceid, 5 mg/g; 2,3,5,4'-tetrahydroxystilbene-2-O- $\beta$ -D-glucoside, 15 mg/g; rhaponticoside, 10 mg/g; emodin-8-glucoside, 3 mg/g; physcion-8-glucoside, 1 mg/g; emodin, 0.5 mg/g; chrysophanol, 2 mg/g; physcion, 2 mg/g. After drying, the spiked samples (0.2 g) was mixed with diatomaceous earth (0.5 g) and placed into 11-mL stainless steel extraction cell, respectively. Extraction of the spiked samples according to the orthogonal test  $L_9(3^4)$  (Table S1). The extract was transferred into a 25-mL volumetric flask, which was filled up to the calibration mark with methanol. The test solution was determined with the present HPLC method, and the total determined amount of the spiked standards was calculated using the calibration curves in Table 3. The recovery=100\*(total amount of the determined standards/ total amount of the spiked standards). From the results in Table S2, the condition of A3B1C2D2 (namely extraction temperature, 150 °C; pressure, 1200 psi; time, 15 min and flush volume, 45%) was chosen as the optimized PLE conditions.

**Table S1** Factors and levels

| Levels | A: Temperature<br>(°C) | B: Pressure<br>(psi) | C: Time<br>(min) | D: Flush volume<br>(%) |
|--------|------------------------|----------------------|------------------|------------------------|
| 1      | 100                    | 1200                 | 10               | 30                     |
| 2      | 120                    | 1500                 | 15               | 45                     |
| 3      | 150                    | 1800                 | 20               | 60                     |

**Table S2** Results of  $L_9(3^4)$  orthogonal test

| Test No.          | Four factors |     |     |     | Recovery of the spiked<br>compounds (%) |
|-------------------|--------------|-----|-----|-----|-----------------------------------------|
|                   | A            | B   | C   | D   |                                         |
| 1                 | 1            | 1   | 1   | 1   | 65                                      |
| 2                 | 1            | 2   | 2   | 2   | 67                                      |
| 3                 | 1            | 3   | 3   | 3   | 68                                      |
| 4                 | 2            | 1   | 2   | 3   | 70                                      |
| 5                 | 2            | 2   | 3   | 1   | 59                                      |
| 6                 | 2            | 3   | 1   | 2   | 67                                      |
| 7                 | 3            | 1   | 3   | 2   | 89                                      |
| 8                 | 3            | 2   | 1   | 3   | 75                                      |
| 9                 | 3            | 3   | 2   | 1   | 80                                      |
| <i>K1</i>         | 200          | 224 | 207 | 204 |                                         |
| <i>K2</i>         | 196          | 201 | 217 | 223 |                                         |
| <i>K3</i>         | 244          | 215 | 216 | 213 |                                         |
| Extreme deviation | 48           | 23  | 10  | 19  |                                         |
